# Supplementary material for: The durability of carbon nanotubes in the selective reduction of nitrobenzene
Source: Royal Society of Chemistry journal article supplement (doi:10.1039/d0cp00186d), 2020-01-01
Supplement: d0cp00186d1.pdf [file d0cp00186d1.pdf]

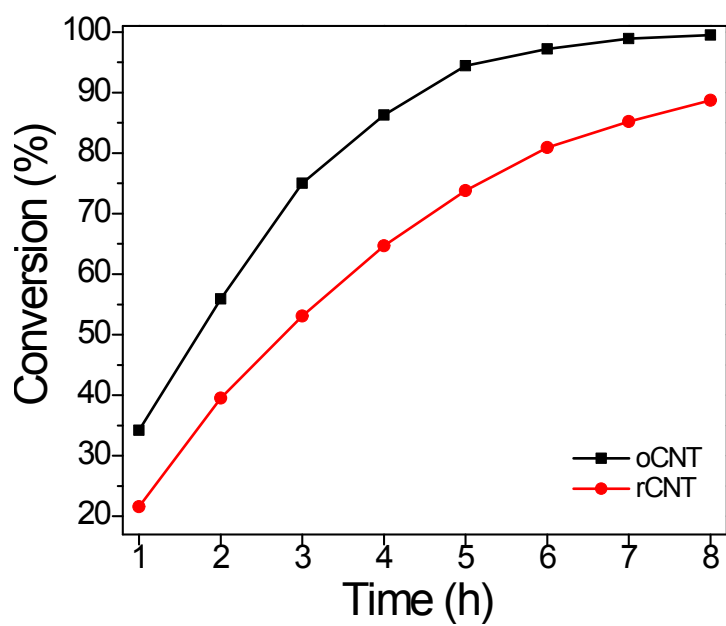

Figure S1. The activity of oCNT and rCNT in the reduction of nitrobenzene Conditions: 20 mg of catalyst, 10 mmol of nitrobenzene, 50 mmol of hydrazine hydrate, 2 mL ethanol, 100 °C.

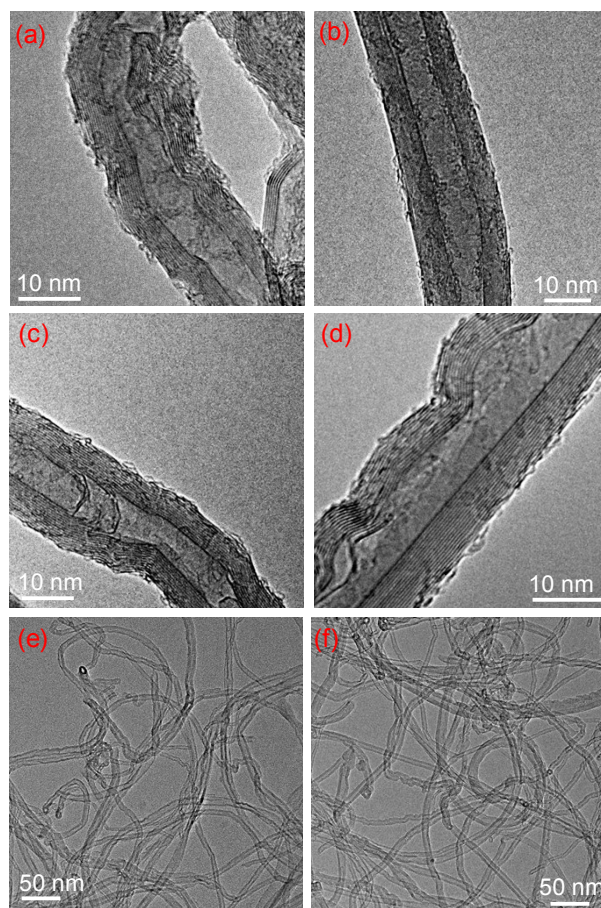

Figure S2. TEM images of the fresh and spent catalysts (a and b are images for the fresh and spent oCNT, respectively. c and e are images for fresh rCNT, while d and f are for spent rCNT)

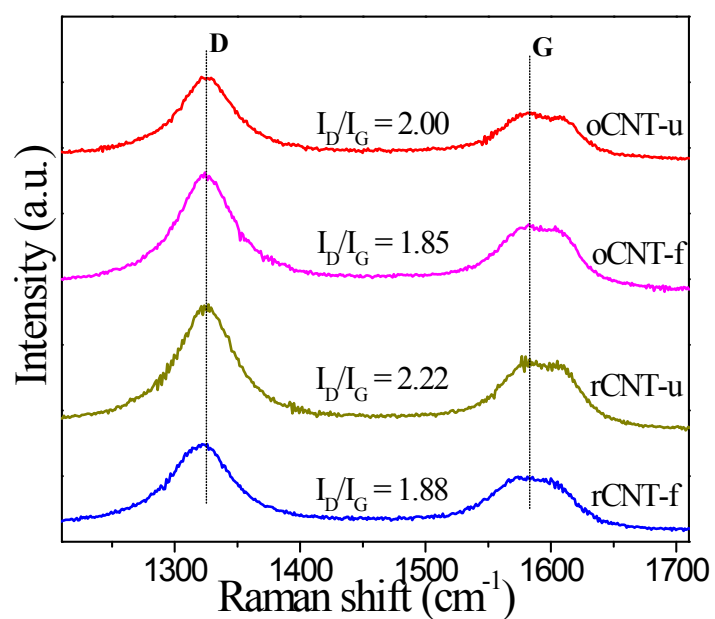

Figure S3. Raman spectra of the samples

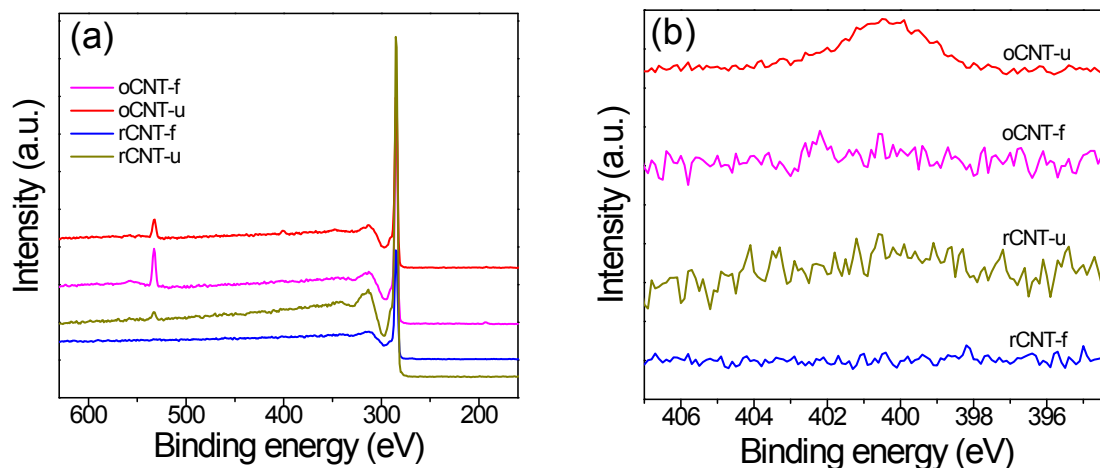

Figure S4. XPS scan (a) and the N1s spectra of the samples
